# Supplementary material
Source: publisher figshare collection journal article supplement (https://sage.figshare.com/ndownloader/files/23349782)
Supplement: Supplementary file 1 [file 23349782]

## **Material flow analysis and heavy hydrocarbons removal in a full-scale biopile and soil washing plant in northern Italy**

Mentore Vaccari<sup>1</sup>, Francine Duarte Castro, Martina Stolfini

University of Brescia - Department of Civil, Environmental, Architectural Engineering and Mathematics, Brescia, BS, Italy

<sup>1</sup> Corresponding author. Mailing address: via Branze, 43 – 25123, Brescia, Italy. Tel. +39 030 3711300, Fax +39 030 3711312, E-mail: [mentore.vaccari@unibs.it](mailto:mentore.vaccari@unibs.it)

## Supplementary Figures

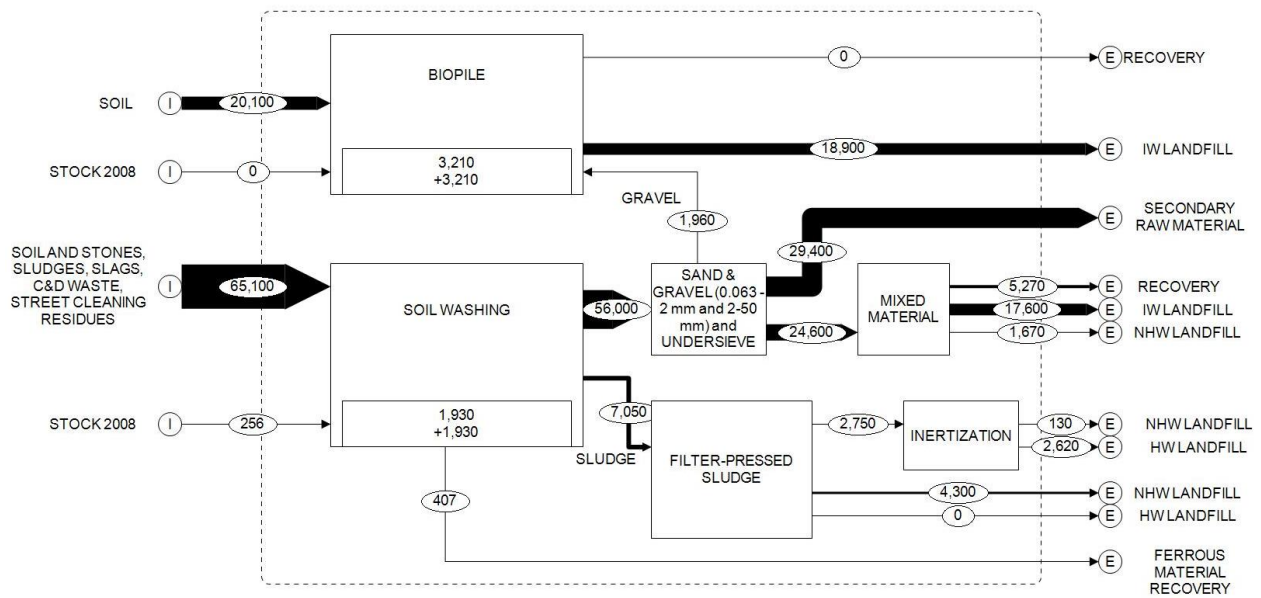

FigS1 Waste and residues mass fluxes [tons] (2009)

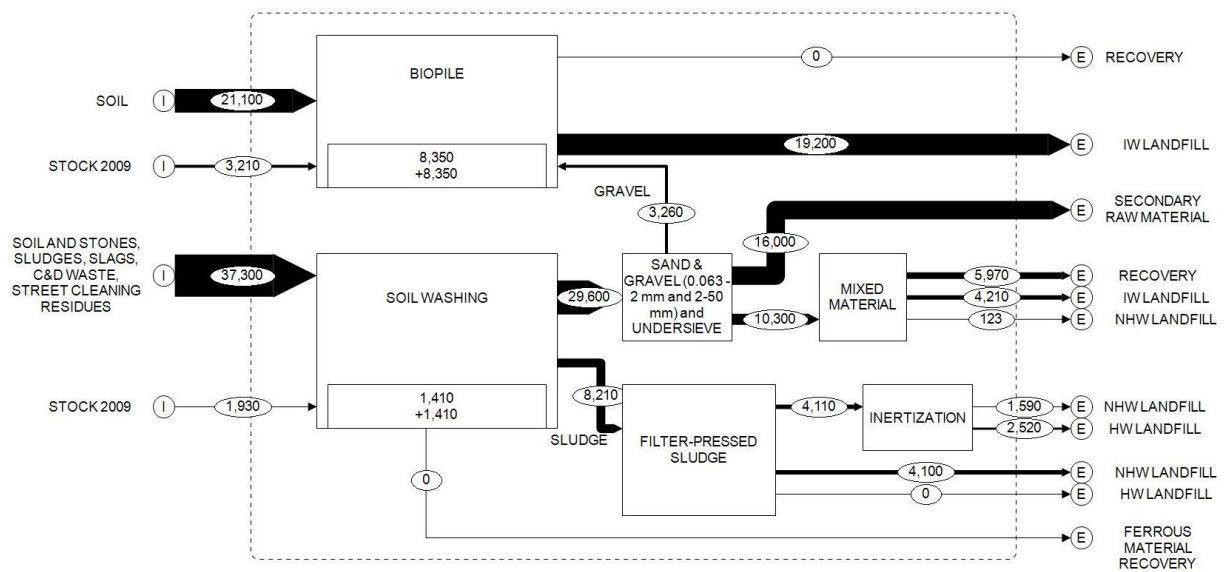

FigS2 Waste and residues mass fluxes [tons] (2010)

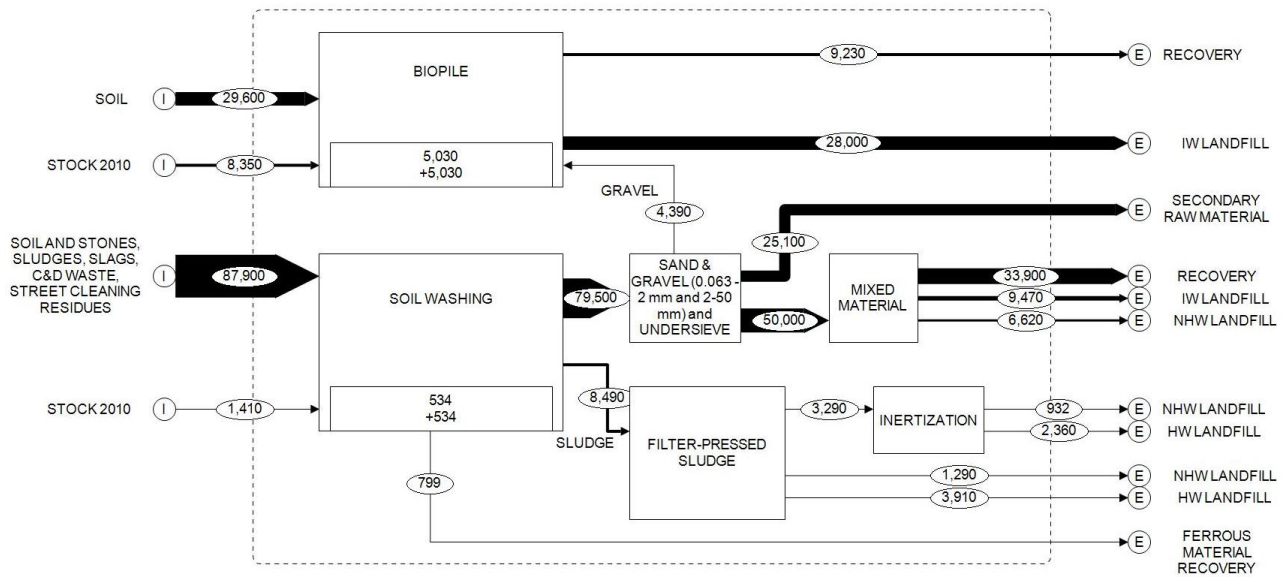

FigS31 Waste and residues mass fluxes [tons] (2011)

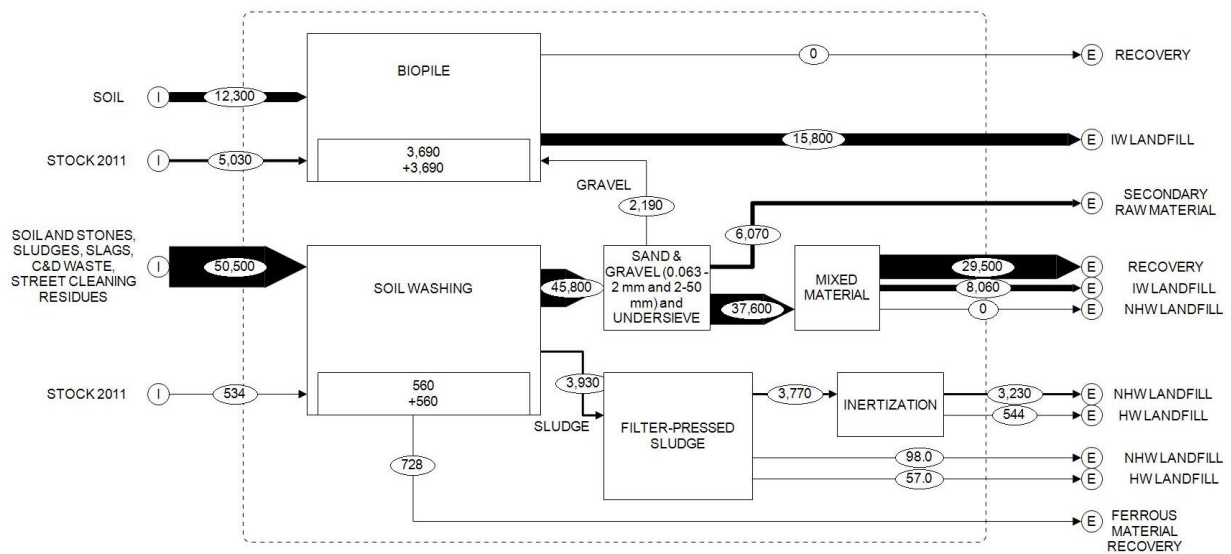

FigS4 Waste and residues mass fluxes [tons] (2012)

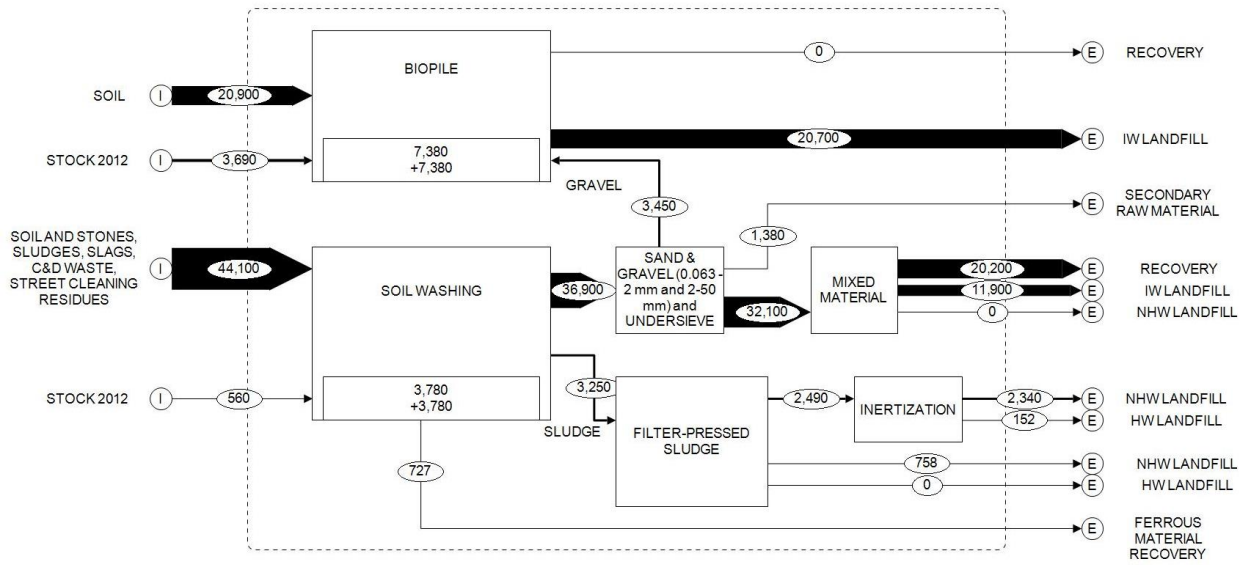

FigS5 Waste and residues mass fluxes [tons] (2013)

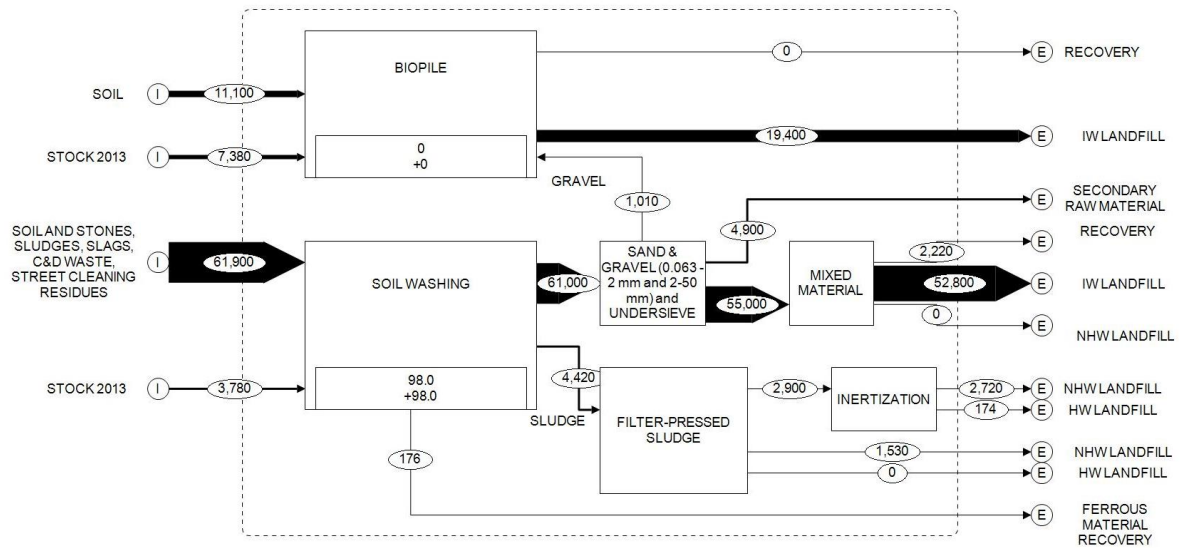

FigS6 Waste and residues mass fluxes [tons] (2014)

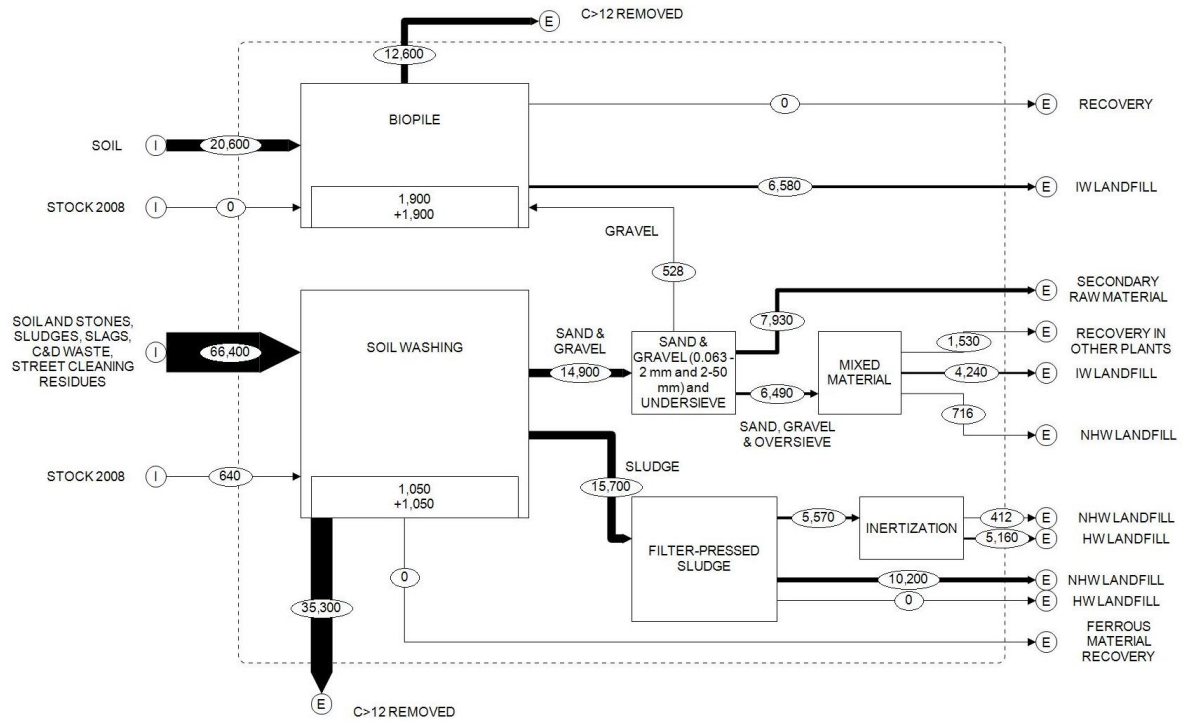

*FigS7 Hydrocarbons mass fluxes [kg] (2009)*

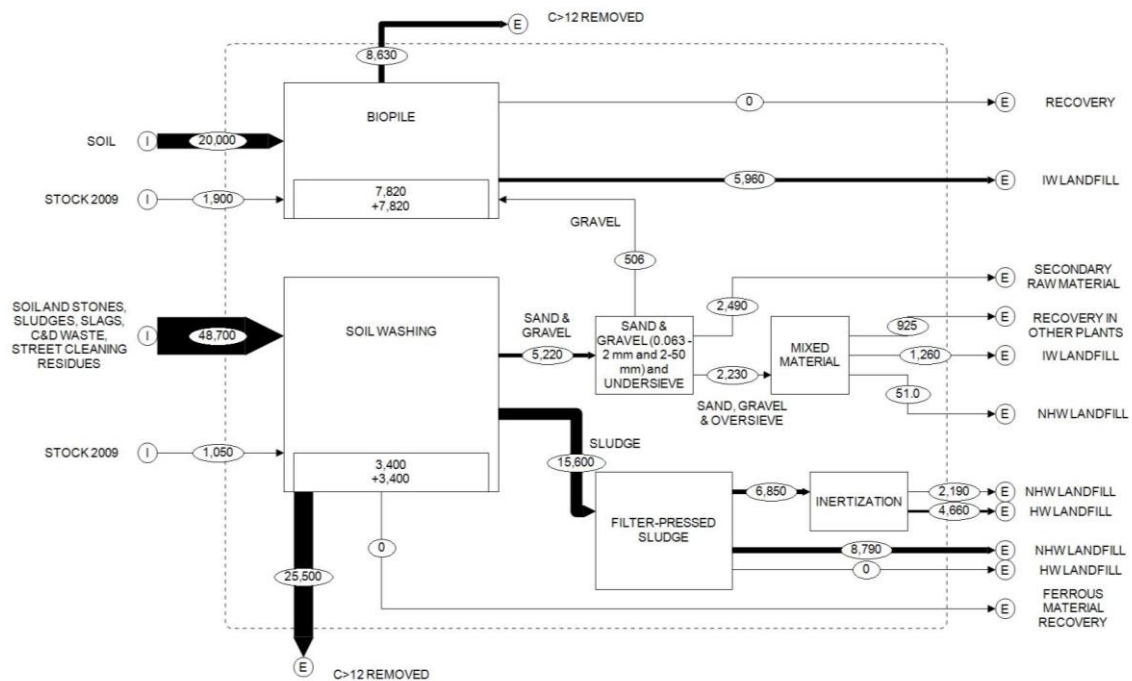

*FigS8 Hydrocarbons mass fluxes [kg] (2010)*

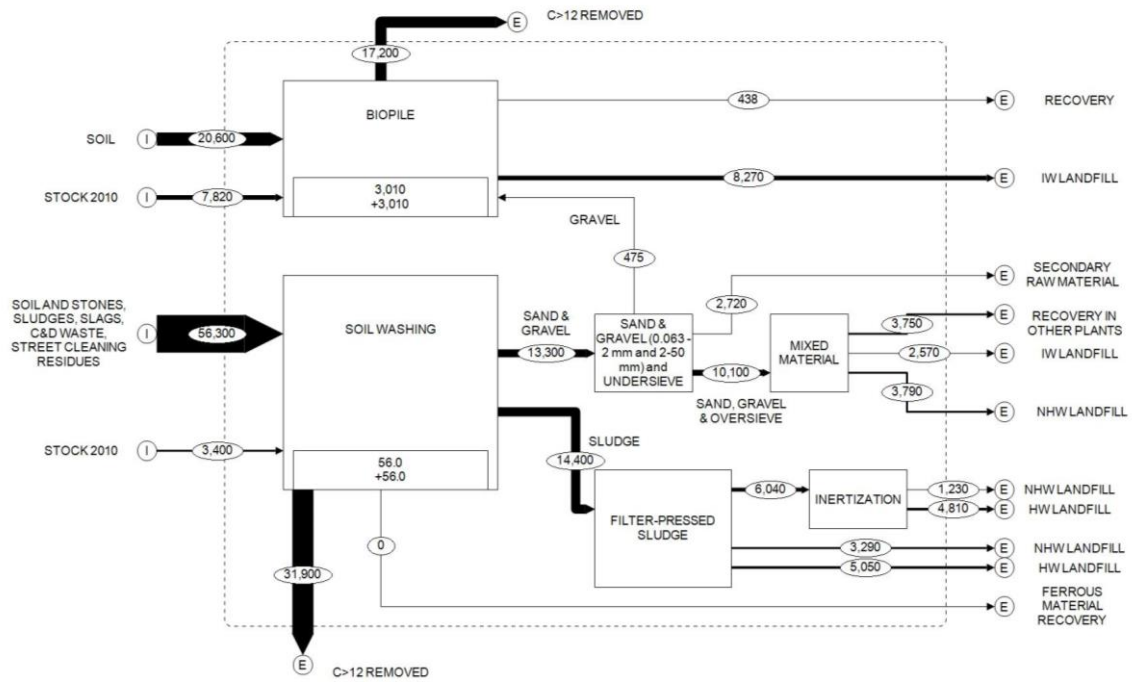

FigS9 Hydrocarbons mass fluxes [kg] (2011)

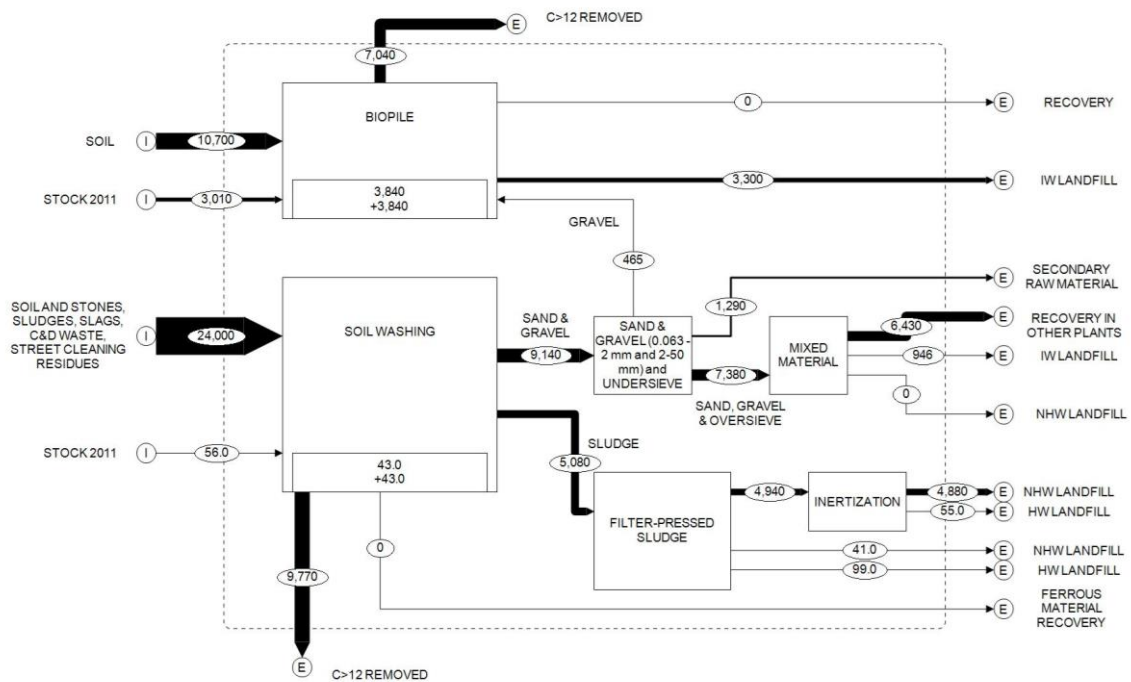

FigS10 Hydrocarbons mass fluxes [kg] (2012)

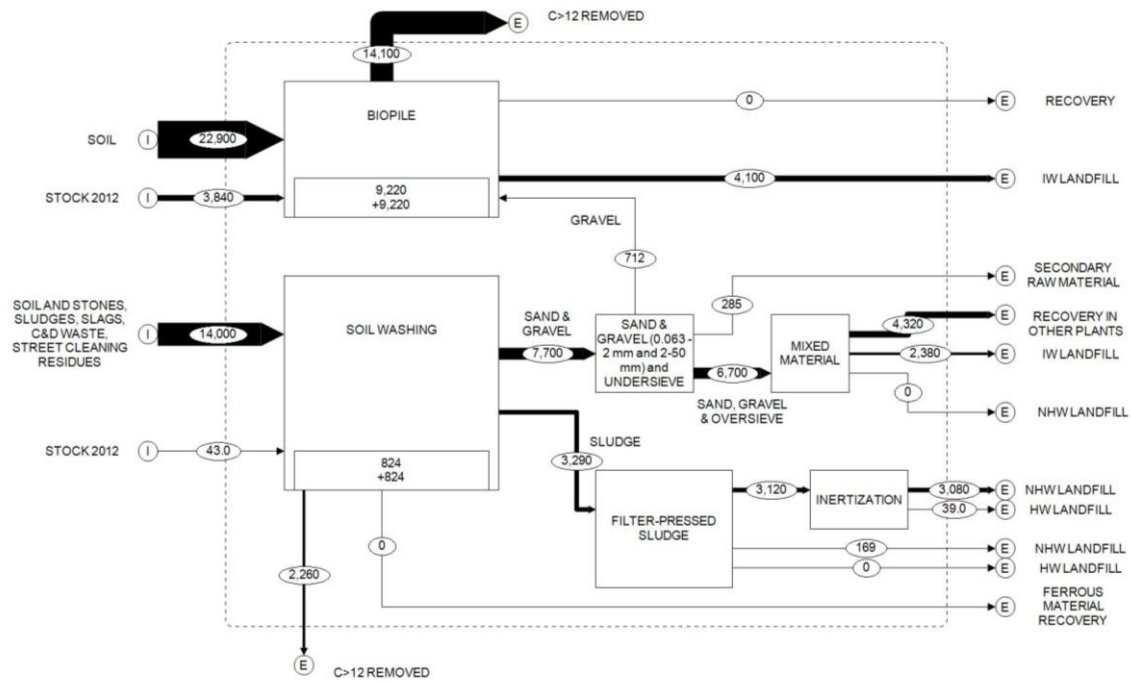

FigS11 Hydrocarbons mass fluxes [kg] (2013)

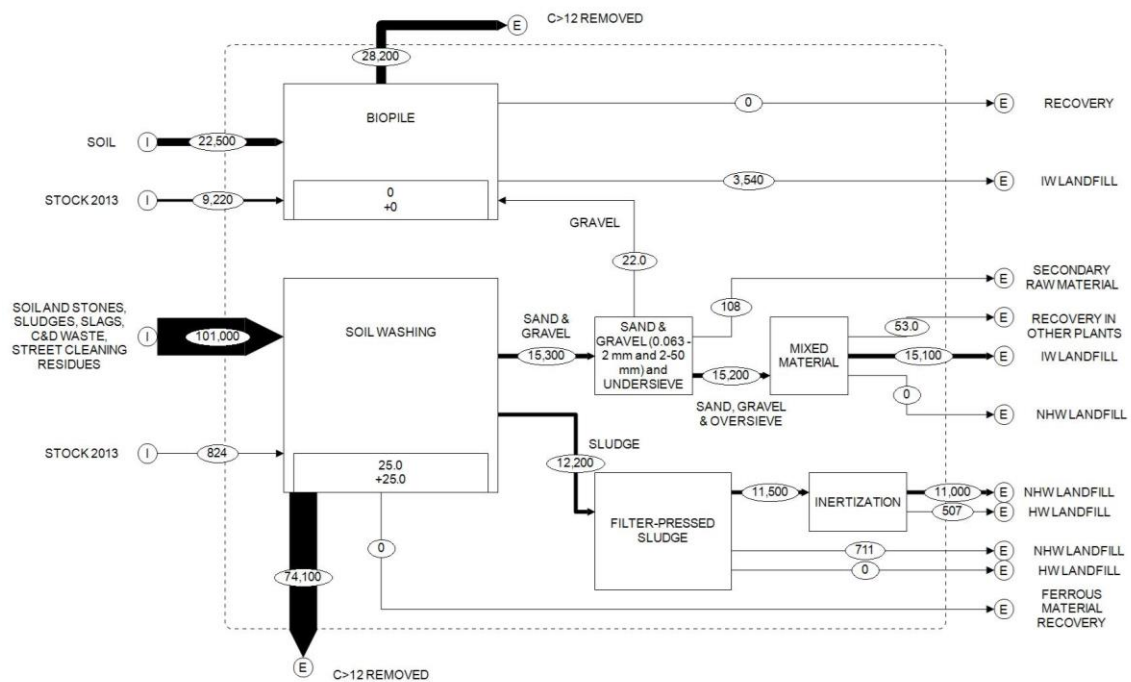

FigS12 Hydrocarbons mass fluxes [kg] (2014)
